# Supplementary material for: La(OH)3:Eu3+and La2O3:Eu3+nanorod bundles: growth mechanism and luminescence properties
Source: Royal Society of Chemistry journal article supplement (doi:10.1039/c5ce01688f), 2015-01-01
Supplement: c5ce01688f1.pdf [file c5ce01688f1.pdf]

## Electronic Supporting Information for CrystEngComm

### **La(OH)<sub>3</sub>:Eu<sup>3+</sup> and La<sub>2</sub>O<sub>3</sub>:Eu<sup>3+</sup> nanorod bundles: Growth mechanism and luminescent properties**

Sk. Khaja Hussain†, Goli Nagaraju, E. Pavitra, G. Seeta Rama Raju†, and Jae Su Yu\*

Department of Electronics and Radio Engineering, Institute for Wearable Convergence Electronics, Kyung Hee University, 1 Seocheon-dong, Giheung-gu, Yongin-si, Gyeonggi-do 446-701 Republic of Korea.

†equally contributed to this work

\*Corresponding author

E-mail: [jsyu@khu.ac.kr](mailto:jsyu@khu.ac.kr)

Phone: +82-31-201-3820; FAX: +82-206-2820.

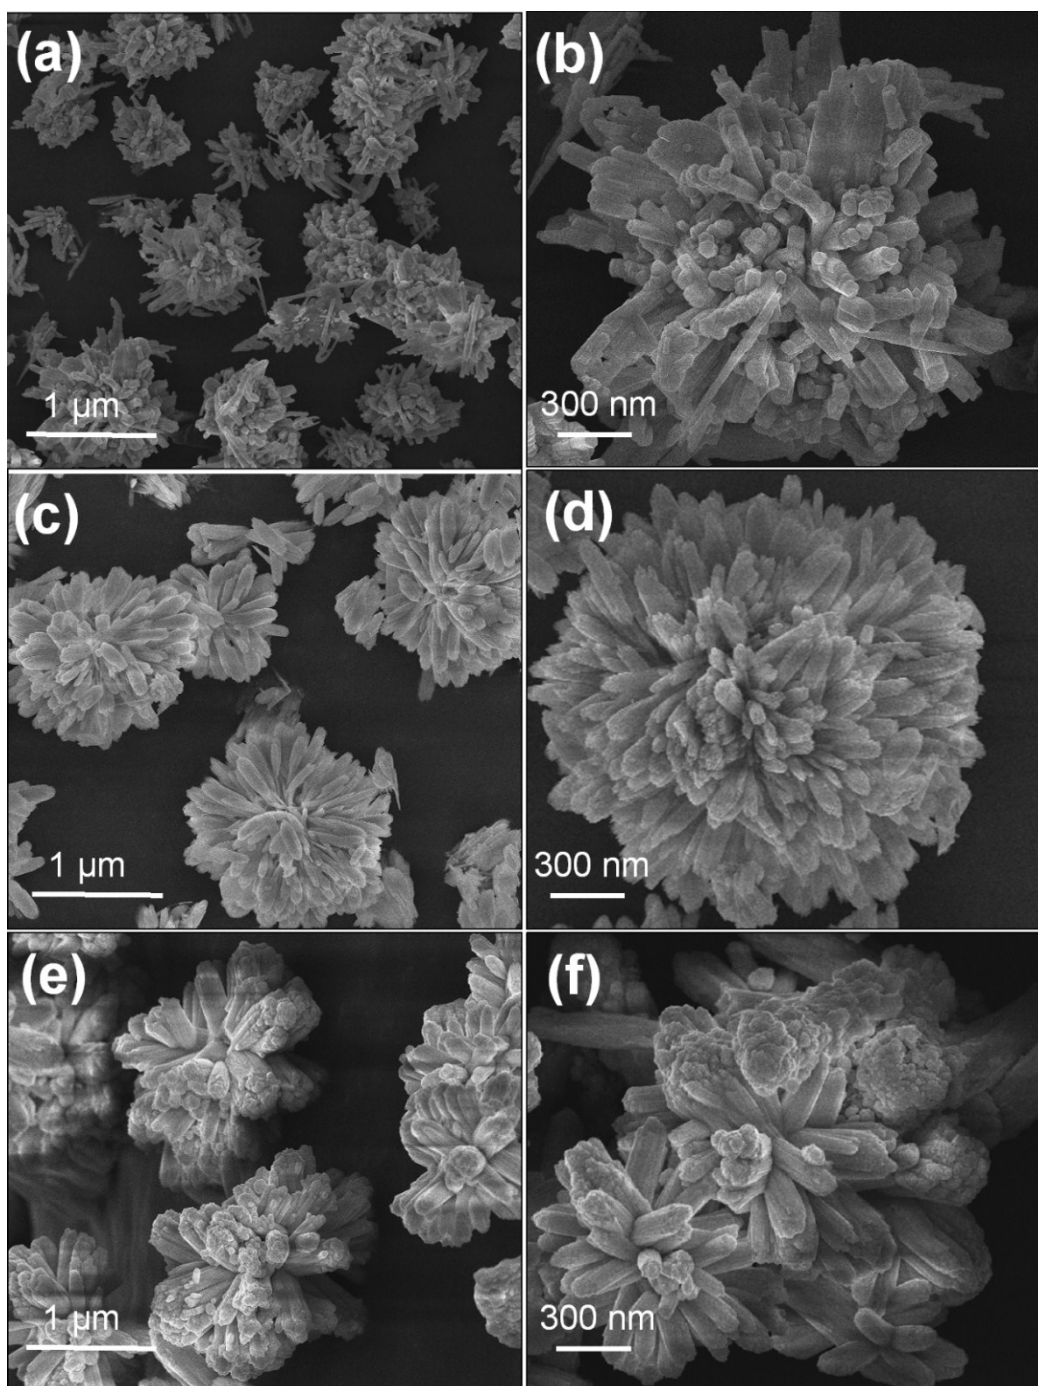

**Fig. S1.** FE-SEM images of the as-prepared  $\text{La}(\text{OH})_3:0.05\text{Eu}^{3+}$  samples at different molar ratios of  $\text{HMTA}/\text{La}(\text{NO}_3)_3$  (a & b) (0.5:1), (c & d) (1:1), (e & f) (1.5:1) for low- and high-magnification images, respectively.

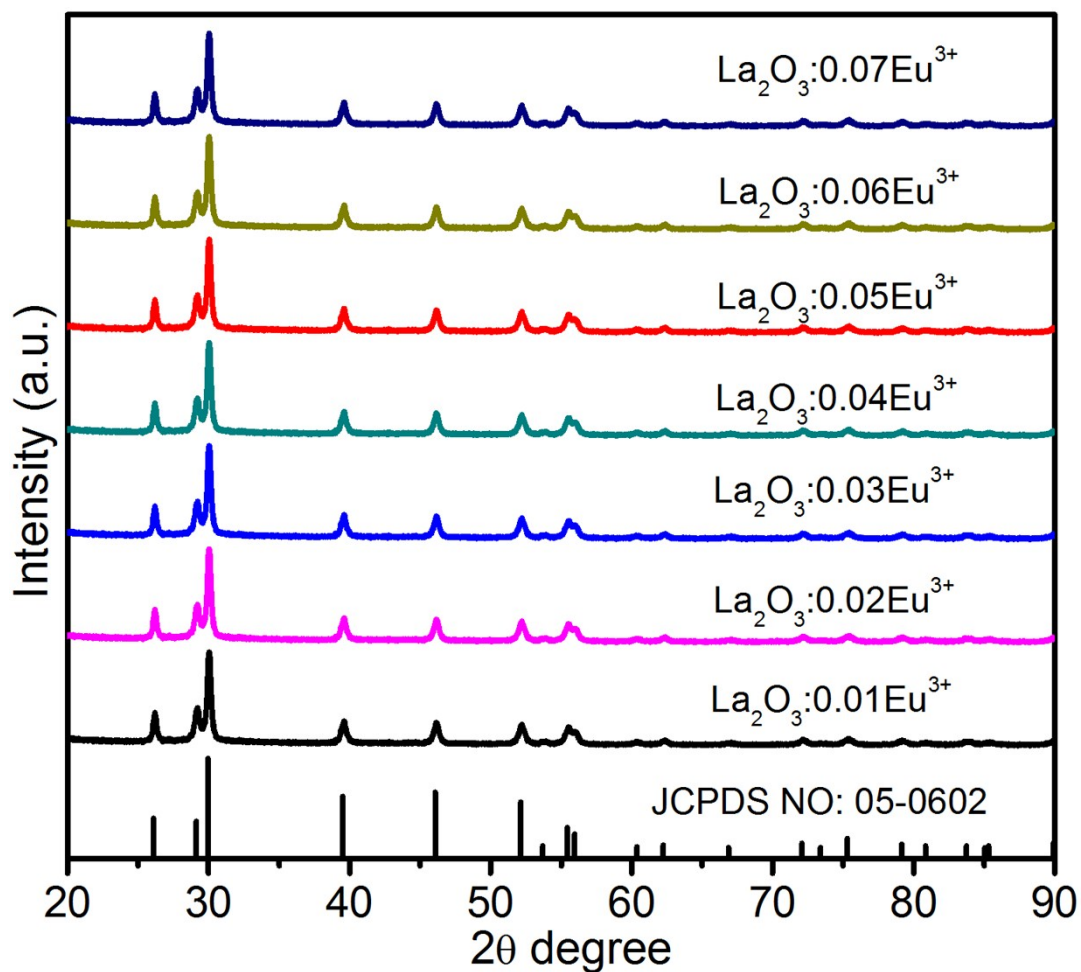

**Fig. S2.** XRD patterns of  $\text{La}_2\text{O}_3:\text{Eu}^{3+}$  3D flower-like nanorod bundles as a function of  $\text{Eu}^{3+}$  ion concentration.
